# Supplementary material for: Double-Layered Zirconia Films for Carbon-Based Mesoscopic Perovskite Solar Cells and Photodetectors
Source: Hindawi journal article supplement (doi:10.1155/2019/8348237), 2019-05-22
Supplement: f1 [file 8348237.f1.docx]

## Supplementary Materials

**1. Properties of ZrO2 film prepared by microparticles**

**Figure S1:** Grain size distribution of a ZrO2 film using a ZrO2 powder consisting of microparticles (Cerac Z-1074)

**2. Crystal structure of perovskite layers after deposition on the surface of the two different ZrO2 films**

A closer view of the different XRD peaks, showing the differences in the intensity of the peaks for the perovskite layer deposited on the two ZrO2 films.

|  |  |
| --- | --- |
|  |  |

**Figure S2:** XRD pattern of the perovskite layer deposited on the surface of the two different ZrO2 layers

**3. Response of photodetectors**

Transient photocurrent response during on-off cycle for the determination of the rise and fall time of the photodetector.

|  |  |
| --- | --- |

**Figure S3:** Transient photocurrent response during on-off illumination at a bias potential of 1V.

The rise and fall time are defined as the time needed for the photocurrent to increase or to decrease by 90% compared to its peak value [1,2]. Responsivity is defined by the following equation:

**4. Characteristic I-V curves of devices before deposition of the perovskite**

Current voltage curves of carbon-based PSCs before deposition of the perovskite, showing that the insulating properties of the zirconia spacer layer improves with its thickness, since both the applied bias potential where current begins to flow increases and the current for the same applied bias potential has a lower value.

**Figure S4:** Typical J-V curves prepared with a N_ZrO2 film as a spacer with different thicknesses, before the deposition of the perovskite.

**5. Comparison with the literature**

**Table S1:** Materials and efficiency of perovskite solar cells based on ZnO as ETL

| **ETM** | **HTM** | **Back contact** | **PCE %** | **Ref.** |
| --- | --- | --- | --- | --- |
| ZnO Nanorods | P3HT | Au | 3.05 | [3] |
| ZnO Nanorods/TiO2 nanoparticles | P3HT | 3.41 | [3] |
| N doped ZnO Nanorods | Spiro-OMeTAD | 16.2 | [4] |
| ZnO Nanorods | Spiro-OMeTAD | 11.1 | [5] |
| ZnO Nanorods | Spiro-OMeTAD | 9.2 | [6] |
| ZnO Nanorods | Spiro-OMeTAD | 8.5 | [7] |
| ZnO Nanorods | Spiro-OMeTAD | 8 | [8] |
| ZnO Nanorods | Spiro-OMeTAD | 6.6 | [9] |
| ZnO Nanorods | Spiro-OMeTAD | 5.0 | [10] |
| ZnO/TiO2 core shell nanorod array | - | Carbon | 5.56 | [11] |
| ZnO Nanorods | - | 4.2-5.4 | Present study |
| ZnO Nanorods (PEI) | - | 3.6 | [12] |
| ZnO Nanoparticles | - | 3.8 | [13] |

**References:**

[1] M. He, Y. Chen, H. Liu, J. Wang, X. Fang, Z. Liang, Chemical decoration of CH 3 NH 3 PbI 3 perovskites with graphene oxides for photodetector applications, Chem. Commun. 51 (2015) 9659–9661. doi:10.1039/C5CC02282G.

[2] Y. Wang, Z. Xia, S. Du, F. Yuan, Z. Li, Z. Li, Q. Dai, H. Wang, S. Luo, S. Zhang, H. Zhou, Solution-processed photodetectors based on organic–inorganic hybrid perovskite and nanocrystalline graphite, Nanotechnology. 27 (2016) 175201. doi:10.1088/0957-4484/27/17/175201.

[3] P. Ruankham, D. Wongratanaphisan, A. Gardchareon, S. Phadungdhitidhada, S. Choopun, T. Sagawa, Full coverage of perovskite layer onto ZnO nanorods via a modified sequential two-step deposition method for efficiency enhancement in perovskite solar cells, Appl. Surf. Sci. 410 (2017) 393–400. doi:10.1016/j.apsusc.2017.03.096.

[4] K. Mahmood, B.S. Swain, A. Amassian, 16.1% Efficient Hysteresis-Free Mesostructured Perovskite Solar Cells Based on Synergistically Improved ZnO Nanorod Arrays, Adv. Energy Mater. 5 (2015) 1500568. doi:10.1002/aenm.201500568.

[5] D. Son, J. Im, H. Kim, N. Park, 11% Efficient Perovskite Solar Cell Based on ZnO Nanorods: An Effective Charge Collection System, J. Phys. Chem. C. 118 (2014) 16567–16573. doi:10.1021/jp412407j.

[6] Y. Xu, ​Tian Liu, Z. Li, B. Feng, S. Li, J. Duan, C. Ye, J. Zhang, H. Wang, Preparation and photovoltaic properties of perovskite solar cell based on ZnO nanorod arrays, Appl. Surf. Sci. 388 (2016) 89–96. doi:10.1016/j.apsusc.2016.03.079.

[7] J. Dong, Y. Zhao, J. Shi, H. Wei, J. Xiao, X. Xu, J. Luo, J. Xu, D. Li, Y. Luo, Q. Meng, Impressive enhancement in the cell performance of ZnO nanorod-based perovskite solar cells with Al-doped ZnO interfacial modification, Chem. Commun. 50 (2014) 13381–13384. doi:10.1039/C4CC04908J.

[8] D. Son, K.-H. Bae, H.-S. Kim, N. Park, Effects of Seed Layer on Growth of ZnO Nanorod and Performance of Perovskite Solar Cell, J. Phys. Chem. C. 119 (2015) 10321–10328. doi:10.1021/acs.jpcc.5b03276.

[9] M. Wang, S. Li, P. Zhang, Y. Wang, H. Li, Z. Chen, A modified sequential method used to prepare high quality perovskite on ZnO nanorods, Chem. Phys. Lett. 639 (2015) 283–288. doi:10.1016/j.cplett.2015.09.044.

[10] D. Bi, G. Boschloo, S. Schwarzmüller, L. Yang, E.M.J. Johansson, A. Hagfeldt, Efficient and stable CH3NH3PbI3-sensitized ZnO nanorod array solid-state solar cells, Nanoscale. 5 (2013) 11686. doi:10.1039/c3nr01542d.

[11] B.X. Wang, T.F. Liu, Y.B. Zhou, X. Chen, X.B. Yuan, Y.Y. Yang, W.P. Liu, J.M. Wang, H.W. Han, Y.W. Tang, Hole-conductor-free perovskite solar cells with carbon counter electrodes based on ZnO nanorod arrays, Phys. Chem. Chem. Phys. 18 (2016) 27078–27082. doi:10.1039/C6CP04793A.

[12] H. Wang, L. Yan, J. Liu, J. Li, H. Wang, Fabrication of well-aligned ZnO nanorod photoanodes for perovskite solar cells, J. Mater. Sci. Mater. Electron. 27 (2016) 6872–6880. doi:10.1007/s10854-016-4640-0.

[13] M. Shirazi, R. Sabet Dariani, M.R. Toroghinejad, Efficiency enhancement of hole-conductor-free perovskite solar cell based on ZnO nanostructure by Al doping in ZnO, Elsevier Ltd, 2017. doi:10.1016/j.jallcom.2016.09.038.
